# Supplementary material for: VISTA Expression on Immune Cells Correlates With Favorable Prognosis in Patients With Triple-Negative Breast Cancer
Source: Front Oncol. 2021 Jan 11;10:583966. doi: 10.3389/fonc.2020.583966 (PMC7829913; doi:10.3389/fonc.2020.583966)
Supplement: Supplementary file 2 [file DataSheet_2.xlsx]

## Sheet: for SPSS
No.	VISTA TC%	VISTA TC% groups	VISTA IC%	VISTA IC% groups	VISTA+CD4（groups）	CD4 TIL%	CD4 groups	CD19 TIL%	CD19 groups	CD8+TIL%	CD8 groups	CD3+TIL%	CD3 groups	TILs%	TILs% groups	RFS status	OS status	RFS（month）	OS(month）	Age	Age 50	Age groups	Grade	Grade groups	CK5/6（阴0阳1未知2）	EGFR	Basal like	Ki67	ki 67 groups（14）	pT	pN	pM	TNM
1	0	0	35	1	3	18	1	0	0	2	0	5	0	0	0	1	0	39.2	83.7	25	1	0	3	1	1	1	1	50	1	2	0	0	2
2	0	0	4	0	0	3	0	0	0	3	0	5	0	1	0	0	0	77.1333	77.1333	25	1	0	3	1	0	1	1	80	1	2	1	0	2
3	0	0	0	0	0	2	0	0	0	1	0	2	0	0	0	1	0	45.1333	90.7667	27	1	0	3	1	0	0	0	30	1	1	0	0	1
4	0	0	5	1	2	1	0	0	0	3	0	3	0	1	0	1	1	49.9	63.8667	27	1	0	3	1	1	1	1	30	1	1	0	0	1
5	0	0	60	1	3	10	1	2	1	15	1	30	1	10	1	0	0	61.3	61.3	27	1	0	3	1	0	1	1	40	1	2	1	0	2
6	0	0	8	1	2	1	0	0	0	2	0	2	0	5	0	0	0	69.1667	69.1667	28	1	0	3	1	1	1	1	60	1	2	0	0	2
7	0	0	20	1	3	10	1	2	1	8	0	15	0	10	1	0	0	87.3	87.3	28	1	0	3	1	1	1	1	65	1	3	1	0	3
8	0	0	1	0	0	1	0	0	0	0	0	1	0	0	0	1	1	3	12.5333	29	1	0	3	1	0	1	1	40	1	2	0	0	2
9	1	1	13	1	3	25	1	3	1	20	1	13	0	5	0	0	0	73.0333	73.0333	30	1	0	3	1	0	1	1	10	0	2	0	0	2
10	1	1	1	0	1	15	1	8	1	2	0	13	0	10	1	0	0	81.1667	81.1667	30	1	0	3	1	1	1	1	10	0	1	0	0	1
11	15	1	25	1	3	60	1	30	1	25	1	35	1	20	1	0	0	55.9	55.9	30	1	0	3	1	1	1	1	85	1	2	1	0	2
12	0	0	8	1	3	12	1	0	0	4	0	5	0	5	0	1	0	15.2	74.6	31	1	0	3	1	0	0	0	5	0	4	3	0	3
13	1	1	75	1	3	20	1	5	1	5	0	8	0	5	0	0	0	69.6667	69.6667	31	1	0	3	1	1	1	1	10	0	2	0	0	2
14	0	0	0	0	1	15	1	4	1	60	1	80	1	10	1	1	1	38.7667	57.5667	31	1	0	3	1	1	1	1	50	1	1	2	0	3
15	0	0	10	1	2	3	0	1	1	13	1	20	1	5	0	0	0	67.1667	67.1667	31	1	0	3	1	1	1	1	60	1	1	0	0	1
16	0	0	50	1	3	20	1	4	1	30	1	50	1	10	1	0	0	61.3	61.3	31	1	0	2	0	1	1	1	70	1	1	0	0	1
17	0	0	1	0	0	5	0	0	0	3	0	3	0	1	0	0	0	65.4667	65.4667	32	1	0	3	1	0	0	0	50	1	2	2	0	3
18	0	0	5	1	3	20	1	1	1	13	1	15	0	5	0	0	0	65.4667	65.4667	32	1	0	3	1	1	1	1	10	0	1	0	0	1
19	0	0	30	1	2	8	0	3	1	13	1	20	1	10	1	0	0	54.8	54.8	32	1	0	3	1	0	1	1	80	1	2	3	0	3
20	0	0	60	1	3	10	1	3	1	2	0	1	0	1	0	1	1	18.1667	37.9	33	1	0	3	1	0	1	1	50	1	3	0	0	2
21	0	0	0	0	1	10	1	5	1	8	0	15	0	10	1	1	0	8.13333	75.5667	33	1	0	3	1	1	1	1	70	1	2	2	0	3
22	0	0	0	0	0	1	0	0	0	10	1	15	0	5	0	1	1	45.6667	54.8	33	1	0	3	1	1	1	1	85	1	2	0	0	2
23	0	0	0	0	0	0	0	0	0	1	0	1	0	5	0	0	0	95.0667	95.0667	34	1	0	2	0	1	1	1	50	1	1	0	0	1
24	0	0	11	1	2	0	0	5	1	3	0	1	0	5	0	0	0	70.2333	70.2333	34	1	0	3	1	1	1	1	60	1	1	0	0	1
25	0	0	3	0	1	50	1	1	1	13	1	60	1	10	1	0	0	87.9667	87.9667	34	1	0	3	1	0	1	1	70	1	2	1	0	2
26	0	0	11	1	3	15	1	0	0	10	1	8	0	5	0	0	0	83	83	35	1	0	3	1	0	0	0	80	1	2	0	0	2
27	0	0	0	0	1	12	1	0	0	25	1	25	1	5	0	0	0	86.4	86.4	35	1	0	3	1	1	1	1	95	1	2	0	0	2
28	0	0	0	0	0	0	0	0	0	1	0	1	0	20	1	0	0	66.2	66.2	36	1	0	2	0	1	0	1	10	0	1	0	0	1
29	1.5	1	0	0	0	1	0	0	0	1	0	3	0	1	0	1	1	15.9	26.0333	36	1	0	2	0	1	1	1	20	1	2	2	0	3
30	0	0	1	0	1	10	1	1	1	4	0	5	0	5	0	1	1	51.4	61.5	36	1	0	3	1	0	1	1	10	0	2	2	0	3
31	0	0	25	1	3	33	1	0	0	15	1	28	1	8	1	0	0	68.9333	68.9333	36	1	0	3	1	0	1	1	30	1	2	1	0	2
32	0	0	0	0	0	3	0	0	0	16	1	23	1	5	0	1	1	10.7667	34.0667	36	1	0	3	1	1	1	1	40	1	3	3	0	3
33	0	0	6	1	3	40	1	8	1	30	1	55	1	15	1	0	0	61.0667	61.0667	36	1	0	3	1	1	1	1	45	1	1	1	0	2
34	0	0	1	0	0	1	0	0	0	1	0	1	0	0	0	1	1	5.33333	15.4	36	1	0	2	0	0	0	0	70	1	2	3	0	3
35	1	1	3	0	1	10	1	0	0	15	1	30	1	5	0	1	0	52.9333	96.5333	36	1	0	3	1	1	1	1	80	1	2	0	0	2
36	0	0	5	1	2	5	0	0	0	5	0	10	0	2	0	0	0	59.9333	59.9333	37	1	0	2	0	1	1	1	1	0	2	0	0	2
37	0	0	3	0	0	1	0	0	0	2	0	5	0	10	1	1	0	50.2667	89.8	37	1	0	3	1	1	1	1	50	1	2	0	0	2
38	0	0	1	0	1	10	1	0	0	10	1	20	1	10	1	1	1	20.5667	23.6333	37	1	0	3	1	0	1	1	50	1	1	2	0	3
39	5	1	35	1	2	1	0	3	1	3	0	5	0	1	0	1	1	7.56667	13.6333	37	1	0	3	1	1	1	1	60	1	2	1	0	2
40	0	0	3	0	1	12	1	0	0	10	1	25	1	2	0	0	0	65.1	65.1	37	1	0	2	0	1	1	1	80	1	1	0	0	1
41	1	1	4	0	0	0	0	1	1	9	0	15	0	5	0	0	0	61.5333	61.5333	37	1	0	3	1	1	1	1	80	1	1	0	0	1
42	1	1	7	1	3	60	1	4	1	30	1	50	1	10	1	0	0	77.1667	77.1667	38	1	0	3	1	1	1	1	10	0	2	0	0	2
43	0	0	15	1	3	40	1	10	1	30	1	30	1	10	1	1	1	12.7333	26.9333	38	1	0	2	0	1	1	1	50	1	1	3	0	3
44	0	0	8	1	3	45	1	0	0	20	1	50	1	10	1	0	0	91.3333	91.3333	38	1	0	3	1	1	1	1	70	1	2	0	0	2
45	0	0	0	0	0	1	0	0	0	50	1	65	1	2	0	0	0	100.767	100.767	38	1	0	2	0	1	1	1	80	1	2	2	0	3
46	0	0	1	0	1	35	1	2	1	25	1	35	1	30	1	0	0	74.0667	74.0667	38	1	0	3	1	1	1	1	90	1	1	0	0	1
47	1	1	3	0	1	25	1	2	1	30	1	70	1	30	1	1	0	7.46667	100.767	38	1	0	3	1	0	0	0	90	1	2	0	0	2
48	0	0	4	0	0	0	0	0	0	1	0	1	0	0	0	1	1	28.1333	44.4	39	1	0	2	0	1	1	1	10	0	2	0	0	2
49	0	0	20	1	3	15	1	1	1	8	0	20	1	5	0	0	0	64.5667	64.5667	39	1	0	3	1	0	1	1	30	1	2	1	0	2
50	0	0	5	1	3	30	1	0	0	18	1	35	1	20	1	0	0	76.9333	76.9333	39	1	0	3	1	1	1	1	50	1	1	0	0	1
51	3	1	4	0	0	8	0	0	0	3	0	3	0	1	0	0	0	79.7333	79.7333	39	1	0	3	1	1	1	1	60	1	1	0	0	1
52	1	1	45	1	3	20	1	3	1	4	0	5	0	5	0	0	0	68.9667	68.9667	39	1	0	3	1	1	1	1	70	1	2	0	0	2
53	0	0	40	1	2	5	0	15	1	10	1	30	1	10	1	0	0	63.1	63.1	39	1	0	3	1	1	1	1	70	1	1	0	0	1
54	0	0	35	1	3	15	1	10	1	8	0	20	1	20	1	1	0	11.7667	67.9	39	1	0	3	1	1	1	1	80	1	2	3	0	3
55	0	0	25	1	3	18	1	5	1	10	1	23	1	5	0	0	0	60.5333	60.5333	39	1	0	3	1	1	0	1	90	1	1	0	0	1
56	0	0	6	1	2	0	0	0	0	1	0	5	0	0	0	0	0	83.4333	83.4333	40	1	0	2	0	1	1	1	30	1	1	1	0	2
57	0	0	0	0	0	0	0	0	0	0	0	0	0	1	0	1	0	14.6	62.2667	40	1	0	3	1	0	1	1	30	1	2	0	0	2
58	15	1	0	0	1	35	1	5	1	8	0	25	1	10	1	0	0	87.0333	87.0333	40	1	0	2	0	1	1	1	10	0	1	1	0	2
59	0	0	0	0	0	0	0	0	0	1	0	1	0	1	0	0	0	77.1	77.1	40	1	0	3	1	0	1	1	60	1	2	0	0	2
60	0	0	15	1	3	40	1	0	0	9	0	15	0	5	0	0	0	59.6667	59.6667	40	1	0	3	1	1	1	1	60	1	1	0	0	1
61	0	0	3	0	1	15	1	2	1	45	1	60	1	5	0	1	1	6.33333	10.6	40	1	0	3	1	0	0	0	80	1	2	3	0	3
62	2.5	1	10	1	3	30	1	6	1	13	1	20	1	10	1	0	0	56.6	56.6	40	1	0	2	0	1	1	1	80	1	1	0	0	1
63	1	1	8	1	3	15	1	5	1	5	0	11	0	10	1	0	0	71.4	71.4	40	1	0	2	0	1	1	1	85	1	1	0	0	1
64	0	0	1	0	0	5	0	0	0	10	1	10	0	0	0	0	0	90.2667	90.2667	40	1	0	3	1	0	0	0	90	1	1	0	0	1
65	40	1	60	1	3	30	1	5	1	15	1	50	1	10	1	0	0	84.4	84.4	40	1	0	3	1	0	1	1	90	1	2	1	0	2
66	0	0	1	0	0	1	0	0	0	1	0	1	0	5	0	1	1	20.5667	28.0333	41	0	0	3	1	0	1	1	30	1	2	1	0	2
67	1	1	0	0	0	0	0	0	0	0	0	1	0	5	0	1	1	22.6667	40.9667	41	0	0	3	1	1	1	1	10	0	1	2	0	3
68	0	0	1	0	1	10	1	0	0	20	1	25	1	5	0	0	0	103.133	103.133	41	0	0	2	0	1	1	1	10	0	1	0	0	1
69	0	0	0	0	1	50	1	0	0	6	0	18	0	0	0	0	0	88.6667	88.6667	41	0	0	2	0	1	1	1	50	1	2	0	0	2
70	0	0	1	0	0	1	0	0	0	1	0	1	0	5	0	0	0	101.2	101.2	41	0	0	3	1	1	1	1	80	1	2	1	0	2
71	0	0	8	1	3	70	1	8	1	65	1	80	1	10	1	0	0	75.7333	75.7333	41	0	0	3	1	0	1	1	80	1	1	2	0	3
72	0	0	5	1	3	80	1	5	1	60	1	80	1	30	1	0	0	89.0333	89.0333	41	0	0	3	1	0	1	1	80	1	1	0	0	1
73	0	0	1	0	0	1	0	0	0	4	0	7	0	2	0	0	0	100.733	100.733	42	0	0	3	1	1	1	1	10	0	1	0	0	1
74	0	0	20	1	3	30	1	8	1	28	1	28	1	10	1	1	1	3.4	27.2333	42	0	0	3	1	1	1	1	30	1	2	3	0	3
75	0	0	3	0	0	5	0	0	0	1	0	1	0	0	0	0	0	83.9333	83.9333	42	0	0	2	0	1	1	1	40	1	1	0	0	1
76	0	0	20	1	3	10	1	0	0	3	0	8	0	5	0	0	0	66.4667	66.4667	42	0	0	3	1	0	1	1	70	1	1	0	0	1
77	0	0	0	0	0	1	0	0	0	1	0	1	0	1	0	0	0	55.2	55.2	42	0	0	3	1	0	0	0	75	1	1	0	0	1
78	0	0	5	1	3	15	1	3	1	10	1	25	1	10	1	1	1	11.3	13.2667	42	0	0	3	1	0	1	1	80	1	2	0	0	2
79	0	0	3	0	0	8	0	0	0	2	0	5	0	1	0	0	0	55	55	42	0	0	3	1	1	1	1	90	1	1	0	0	1
80	0	0	55	1	2	8	0	1	1	6	0	23	1	5	0	1	0	45.0333	63.2333	43	0	0	2	0	1	0	1	50	1	2	1	0	2
81	0	0	25	1	2	8	0	30	1	20	1	45	1	15	1	0	0	100.4	100.4	43	0	0	3	1	1	1	1	70	1	2	0	0	2
82	0	0	100	1	2	0	0	0	0	1	0	1	0	1	0	0	0	75.7333	75.7333	43	0	0	2	0	0	1	1	80	1	2	1	0	2
83	0	0	8	1	3	28	1	1	1	15	1	20	1	5	0	0	0	75.2	75.2	44	0	0	2	0	0	1	1	5	0	1	0	0	1
84	0	0	8	1	2	1	0	0	0	10	1	6	0	5	0	0	0	69.4333	69.4333	44	0	0	3	1	1	1	1	60	1	2	1	0	2
85	0	0	55	1	3	10	1	5	1	8	0	20	1	5	0	0	0	81.3	81.3	44	0	0	3	1	1	1	1	70	1	2	1	0	2
86	0	0	11	1	2	3	0	6	1	11	1	11	0	10	1	0	0	72.7	72.7	44	0	0	3	1	1	1	1	70	1	1	0	0	1
87	0	0	4	0	1	20	1	7	1	13	1	30	1	10	1	1	1	7.2	14.2667	44	0	0	3	1	1	1	1	70	1	2	0	0	2
88	0	0	10	1	3	55	1	5	1	30	1	60	1	10	1	0	0	65.2333	65.2333	44	0	0	3	1	1	1	1	70	1	2	0	0	2
89	0	0	0	0	0	0	0	0	0	1	0	1	0	1	0	0	0	89.8	89.8	44	0	0	3	1	0	0	0	80	1	1	0	0	1
90	0	0	5	1	2	5	0	0	0	3	0	8	0	10	1	0	0	60.8333	60.8333	44	0	0	2	0	1	1	1	80	1	1	0	0	1
91	0	0	1	0	1	20	1	3	1	8	0	10	0	10	1	0	0	86.3333	86.3333	44	0	0	3	1	1	1	1	80	1	2	2	0	3
92	0	0	0	0	0	8	0	0	0	3	0	15	0	10	1	1	1	32.2667	46.4	45	0	0	2	0	0	1	1	30	1	3	3	0	3
93	0	0	15	1	2	8	0	3	1	1	0	1	0	10	1	0	0	91.3333	91.3333	45	0	0	2	0	1	1	1	40	1	1	0	0	1
94	0	0	10	1	3	50	1	10	1	80	1	80	1	20	1	1	0	14.6	100.8	45	0	0	3	1	1	1	1	40	1	1	1	0	2
95	11	1	11	1	3	10	1	0	0	5	0	10	0	5	0	0	0	60.5667	60.5667	45	0	0	3	1	1	1	1	60	1	2	0	0	2
96	0	0	0	0	1	10	1	0	0	5	0	15	0	5	0	1	1	34.7	51.7667	45	0	0	2	0	1	1	1	60	1	1	1	0	2
97	0	0	1	0	1	11	1	0	0	50	1	50	1	5	0	0	0	8.46667	100.767	45	0	0	3	1	1	1	1	70	1	2	2	0	3
98	0	0	0	0	0	2	0	0	0	1	0	1	0	0	0	0	0	86.4667	86.4667	45	0	0	3	1	0	1	1	80	1	1	0	0	1
99	0	0	3	0	1	30	1	30	1	10	1	10	0	5	0	0	0	72.7	72.7	45	0	0	3	1	0	1	1	80	1	2	3	0	3
100	2.5	1	6	1	2	5	0	0	0	25	1	40	1	5	0	0	0	84.4667	84.4667	45	0	0	3	1	0	1	1	10	0	2	0	0	2
101	0	0	2	0	0	0	0	5	1	10	1	30	1	5	0	0	0	96.8333	96.8333	46	0	0	3	1	1	1	1	10	0	1	0	0	1
102	0	0	1	0	0	1	0	0	0	1	0	1	0	0	0	0	0	69.7333	69.7333	46	0	0	2	0	0	1	1	45	1	1	0	0	1
103	0	0	1	0	0	5	0	1	1	3	0	5	0	1	0	0	0	59.7333	59.7333	46	0	0	2	0	0	1	1	50	1	1	0	0	1
104	0	0	1	0	1	20	1	0	0	1	0	2	0	0	0	0	0	85.9667	85.9667	46	0	0	3	1	0	0	0	60	1	2	1	0	2
105	0	0	1	0	1	10	1	0	0	3	0	8	0	5	0	1	1	5.73333	14.1333	46	0	0	2	0	0	1	1	70	1	2	2	0	3
106	5	1	40	1	3	70	1	2	1	18	1	40	1	5	0	0	0	79.9	79.9	46	0	0	2	0	1	1	1	70	1	1	0	0	1
107	0	0	1	0	1	50	1	70	1	13	1	30	1	30	1	0	0	73.1333	73.1333	46	0	0	3	1	1	1	1	70	1	2	0	0	2
108	0	0	5	1	3	20	1	1	1	30	1	50	1	10	1	0	0	98.2	98.2	46	0	0	3	1	1	1	1	90	1	2	0	0	2
109	0	0	10	1	2	8	0	1	1	5	0	5	0	15	1	0	0	87.9	87.9	46	0	0	2	0	1	1	1	10	0	1	0	0	1
110	0	0	3	0	0	1	0	0	0	0	0	1	0	0	0	1	1	4.33333	17.8	47	0	0	3	1	1	1	1	10	0	2	0	0	2
111	0	0	8	1	2	1	0	0	0	4	0	4	0	5	0	1	0	15	78.8	47	0	0	2	0	1	1	1	30	1	1	0	0	1
112	1	1	35	1	3	55	1	8	1	40	1	60	1	20	1	0	0	78.8	78.8	47	0	0	3	1	1	1	1	30	1	1	0	0	1
113	0	0	1	0	0	6	0	0	0	5	0	8	0	2	0	0	0	87.9	87.9	47	0	0	3	1	1	1	1	35	1	1	1	0	2
114	0	0	1	0	1	40	1	5	1	40	1	50	1	30	1	0	0	92.1	92.1	47	0	0	3	1	1	0	1	40	1	1	1	0	2
115	0	0	35	1	3	55	1	10	1	35	1	70	1	30	1	0	0	87.8667	87.8667	47	0	0	1	0	0	1	1	60	1	2	1	0	2
116	0	0	20	1	3	12	1	6	1	15	1	25	1	10	1	0	0	90.6667	90.6667	47	0	0	3	1	1	1	1	80	1	1	0	0	1
117	12	1	30	1	3	40	1	10	1	20	1	30	1	15	1	0	0	82.9333	82.9333	47	0	0	3	1	1	1	1	80	1	1	0	0	1
118	0	0	3	0	1	25	1	16	1	20	1	30	1	10	1	0	0	72.2	72.2	47	0	0	2	0	1	1	1	90	1	2	1	0	2
119	10	1	18	1	3	25	1	2	1	13	1	50	1	20	1	0	0	73.6	73.6	47	0	0	2	0	0	1	1	10	0	1	0	0	1
120	0	0	1	0	0	1	0	0	0	1	0	1	0	2	0	1	1	10.3333	24.9	48	0	0	3	1	0	1	1	40	1	2	1	0	2
121	0	0	0	0	0	0	0	0	0	1	0	2	0	5	0	0	0	93.3333	93.3333	48	0	0	3	1	1	1	1	50	1	1	2	0	3
122	0	0	1	0	0	0	0	0	0	0	0	1	0	0	0	1	1	28.7333	32	48	0	0	2	0	0	1	1	55	1	2	3	0	3
123	0	0	5	1	3	30	1	0	0	16	1	40	1	10	1	0	0	86.1667	86.1667	48	0	0	3	1	1	1	1	60	1	2	0	0	2
124	1	1	3	0	1	80	1	5	1	40	1	45	1	20	1	0	0	88.6	88.6	48	0	0	3	1	0	0	0	60	1	2	0	0	2
125	0	0	20	1	3	15	1	1	1	8	0	20	1	5	0	0	0	72.9	72.9	48	0	0	3	1	0	1	1	70	1	1	0	0	1
126	0	0	50	1	3	25	1	10	1	8	0	30	1	20	1	0	0	74.1667	74.1667	48	0	0	3	1	0	1	1	70	1	1	1	0	2
127	0	0	1	0	0	3	0	0	0	6	0	12	0	5	0	0	0	93.3667	93.3667	48	0	0	3	1	0	1	1	85	1	2	0	0	2
128	0	0	35	1	3	20	1	5	1	8	0	13	0	5	0	0	0	76.4667	76.4667	48	0	0	3	1	1	1	1	10	0	1	0	0	1
129	0	0	25	1	3	28	1	3	1	8	0	20	1	5	0	0	0	71.6333	71.6333	48	0	0	2	0	1	1	1	10	0	1	0	0	1
130	0	0	8	1	3	25	1	5	1	10	1	35	1	10	1	0	0	73.9667	73.9667	48	0	0	3	1	1	1	1	10	0	1	0	0	1
131	0	0	0	0	0	3	0	0	0	10	1	10	0	10	1	0	0	91.9333	91.9333	49	0	0	3	1	0	0	0	30	1	1	3	0	3
132	0	0	1	0	0	3	0	0	0	2	0	2	0	0	0	0	0	79.3333	79.3333	49	0	0	3	1	0	1	1	40	1	2	2	0	3
133	6	1	1	0	0	1	0	0	0	1	0	1	0	1	0	0	0	88.9	88.9	49	0	0	3	1	0	1	1	40	1	4	3	0	3
134	0	0	20	1	2	8	0	0	0	2	0	3	0	0	0	0	0	71.3667	71.3667	49	0	0	3	1	1	0	1	50	1	1	0	0	1
135	0	0	45	1	2	3	0	3	1	1	0	2	0	5	0	0	0	66.0667	66.0667	49	0	0	3	1	1	1	1	50	1	1	0	0	1
136	0	0	15	1	3	80	1	15	1	30	1	40	1	15	1	1	0	26.6667	58.0667	49	0	0	3	1	0	1	1	60	1	1	0	0	1
137	0	0	25	1	3	18	1	2	1	25	1	25	1	10	1	0	0	71.1667	71.1667	49	0	0	2	0	0	0	0	70	1	1	0	0	1
138	0	0	35	1	3	45	1	18	1	10	1	30	1	10	1	0	0	83.7	83.7	49	0	0	3	1	1	0	1	70	1	2	1	0	2
139	1	1	20	1	3	10	1	3	1	5	0	10	0	15	1	0	0	91.8667	91.8667	49	0	0	3	1	1	1	1	70	1	2	0	0	2
140	0	0	18	1	3	30	1	40	1	30	1	75	1	30	1	0	0	61.2667	61.2667	49	0	0	3	1	1	1	1	70	1	1	0	0	1
141	0	0	10	1	3	45	1	0	0	11	1	28	1	5	0	0	0	65.2667	65.2667	49	0	0	3	1	1	1	1	80	1	1	0	0	1
142	0	0	5	1	3	16	1	0	0	16	1	35	1	10	1	0	0	101.7	101.7	49	0	0	3	1	1	1	1	80	1	1	0	0	1
143	0	0	15	1	3	10	1	1	1	9	0	9	0	10	1	0	0	89.4333	89.4333	49	0	0	3	1	1	1	1	10	0	2	0	0	2
144	0	0	60	1	2	0	0	0	0	3	0	3	0	5	0	0	0	66.1333	66.1333	49	0	0	3	1	0	1	1	14	0	1	0	0	1
145	0	0	60	1	3	20	1	8	1	18	1	40	1	10	1	0	0	80.1667	80.1667	49	0	0	3	1	1	1	1	10	0	1	0	0	1
146	0	0	10	1	3	25	1	5	1	22	1	30	1	10	1	0	0	66.9333	66.9333	50	0	1	3	1	0	0	0	8	0	2	1	0	2
147	0	0	1	0	1	10	1	15	1	70	1	80	1	30	1	0	0	92.5333	92.5333	50	0	1	2	0	0	0	0	30	1	1	1	0	2
148	0	0	55	1	2	4	0	10	1	20	1	30	1	10	1	0	0	62.2	62.2	50	0	1	3	1	1	1	1	60	1	2	3	0	3
149	0	0	13	1	3	20	1	15	1	30	1	55	1	30	1	0	0	62.9333	62.9333	50	0	1	3	1	0	1	1	70	1	2	2	0	3
150	0	0	50	1	3	33	1	3	1	6	0	16	0	5	0	0	0	66.5	66.5	50	0	1	3	1	1	1	1	80	1	2	1	0	2
151	0	0	5	1	2	3	0	0	0	3	0	3	0	5	0	1	1	5.76667	8.43333	50	0	1	3	1	1	0	1	95	1	1	0	0	1
152	0	0	0	0	0	0	0	0	0	4	0	1	0	1	0	0	0	74.5333	74.5333	51	0	1	3	1	0	0	0	30	1	4	3	0	3
153	1	1	18	1	2	5	0	1	1	10	1	10	0	5	0	0	0	63.9333	63.9333	51	0	1	3	1	1	1	1	30	1	4	3	0	3
154	0	0	2	0	1	20	1	1	1	60	1	75	1	20	1	0	0	100.567	100.567	51	0	1	3	1	1	1	1	60	1	2	0	0	2
155	0	0	1	0	0	1	0	0	0	3	0	10	0	5	0	1	1	20.1667	39.4333	53	0	1	3	1	0	1	1	50	1	2	3	0	3
156	0	0	40	1	3	30	1	8	1	10	1	18	0	20	1	1	0	30.6333	54.9667	53	0	1	3	1	0	1	1	50	1	2	1	0	2
157	0	0	1	0	0	2	0	0	0	20	1	55	1	5	0	1	0	28.7333	100.733	53	0	1	2	0	1	1	1	60	1	1	1	0	2
158	0	0	1	0	1	25	1	25	1	18	1	20	1	60	1	0	0	91.4333	91.4333	53	0	1	3	1	1	1	1	70	1	1	2	0	3
159	1	1	8	1	3	18	1	10	1	20	1	30	1	5	0	1	1	11.3	35.6667	53	0	1	3	1	1	1	1	75	1	2	0	0	2
160	0	0	15	1	3	25	1	0	0	13	1	30	1	5	0	0	0	64.1667	64.1667	53	0	1	3	1	0	1	1	80	1	2	0	0	2
161	0	0	55	1	3	20	1	20	1	20	1	20	1	10	1	0	0	74.0333	74.0333	53	0	1	3	1	1	1	1	80	1	1	1	0	2
162	0	0	45	1	3	35	1	20	1	18	1	45	1	20	1	0	0	77.9333	77.9333	53	0	1	3	1	1	1	1	80	1	1	1	0	2
163	0	0	18	1	2	6	0	0	0	5	0	11	0	10	1	0	0	74.8667	74.8667	53	0	1	3	1	1	1	1	90	1	1	3	0	3
164	0	0	60	1	3	10	1	1	1	5	0	5	0	1	0	1	0	49.4	72.7	54	0	1	3	1	0	1	1	30	1	2	3	0	3
165	0	0	1	0	0	0	0	0	0	4	0	8	0	5	0	0	0	96.1	96.1	54	0	1	2	0	1	1	1	8	0	1	1	0	2
166	0	0	50	1	3	15	1	8	1	5	0	10	0	8	1	0	0	62.6333	62.6333	54	0	1	2	0	0	1	1	10	0	2	3	0	3
167	0	0	15	1	3	40	1	10	1	40	1	40	1	10	1	1	1	7	12.4667	54	0	1	3	1	1	1	1	40	1	1	2	0	3
168	0	0	3	0	1	25	1	4	1	5	0	6	0	5	0	1	0	61.1333	80.7333	55	0	1	2	0	0	0	0	5	0	1	0	0	1
169	12	1	3	0	0	8	0	0	0	4	0	8	0	5	0	0	0	88.8	88.8	55	0	1	2	0	0	0	0	5	0	1	2	0	3
170	0	0	10	1	3	18	1	0	0	10	1	25	1	20	1	0	0	70.1333	70.1333	55	0	1	3	1	0	1	1	10	0	2	0	0	2
171	0	0	19	1	3	40	1	18	1	25	1	35	1	20	1	0	0	70.9	70.9	55	0	1	3	1	1	1	1	10	0	2	0	0	2
172	0	0	8	1	2	4	0	0	0	3	0	5	0	2	0	1	1	11.1667	21.3667	55	0	1	3	1	0	1	1	30	1	3	3	0	3
173	0	0	5	1	2	0	0	5	1	3	0	8	0	5	0	1	1	23.3	41.6	55	0	1	2	0	1	1	1	30	1	2	0	0	2
174	0	0	6	1	3	15	1	0	0	8	0	30	1	5	0	0	0	58.7333	58.7333	55	0	1	3	1	0	1	1	30	1	3	0	0	2
175	0	0	33	1	3	10	1	3	1	40	1	60	1	10	1	1	0	51.6667	62.8	55	0	1	3	1	1	1	1	30	1	1	3	0	3
176	0	0	35	1	3	65	1	10	1	22	1	70	1	10	1	1	1	9.03333	12.3	55	0	1	3	1	1	1	1	40	1	1	2	0	3
177	0	0	15	1	3	80	1	0	0	13	1	35	1	20	1	0	0	70.8667	70.8667	55	0	1	2	0	1	1	1	40	1	1	1	0	2
178	0	0	1	0	0	0	0	0	0	20	1	25	1	10	1	0	0	92.6	92.6	55	0	1	3	1	1	1	1	60	1	2	0	0	2
179	0	0	80	1	3	20	1	25	1	5	0	7	0	10	1	0	0	83.9	83.9	55	0	1	3	1	0	1	1	70	1	2	0	0	2
180	0	0	1	0	1	20	1	5	1	45	1	60	1	15	1	1	1	12.8667	27.7	55	0	1	3	1	1	1	1	70	1	1	0	0	1
181	0	0	1	0	0	0	0	0	0	20	1	20	1	5	0	1	1	6.3	16.2667	56	0	1	2	0	0	1	1	20	1	1	0	0	1
182	0	0	35	1	3	40	1	18	1	32	1	40	1	10	1	0	0	70.8667	70.8667	56	0	1	3	1	0	1	1	50	1	2	1	0	2
183	8	1	10	1	2	6	0	35	1	4	0	8	0	1	0	0	0	69.5333	69.5333	56	0	1	3	1	0	1	1	60	1	1	1	0	2
184	80	1	5	1	2	8	0	0	0	8	0	8	0	1	0	0	0	68.0667	68.0667	56	0	1	1	0	0	1	1	60	1	1	0	0	1
185	0	0	1	0	0	8	0	8	1	45	1	75	1	40	1	1	1	7.83333	10.8667	57	0	1	3	1	0	0	0	30	1	1	3	0	3
186	90	1	1	0	0	1	0	0	0	2	0	1	0	0	0	0	0	55.2667	55.2667	57	0	1	2	0	0	1	1	20	1	2	1	0	2
187	0	0	10	1	2	5	0	0	0	4	0	8	0	5	0	1	0	16.3667	51.8667	57	0	1	3	1	1	1	1	40	1	1	0	0	1
188	0	0	70	1	3	15	1	15	1	15	1	20	1	20	1	0	0	58.2667	58.2667	57	0	1	3	1	0	1	1	60	1	2	1	0	2
189	0	0	40	1	3	30	1	20	1	10	1	65	1	10	1	0	0	66.1667	66.1667	57	0	1	3	1	1	1	1	70	1	1	0	0	1
190	0	0	20	1	3	60	1	4	1	35	1	50	1	20	1	0	0	83.8667	83.8667	57	0	1	3	1	0	1	1	70	1	1	0	0	1
191	0	0	1	0	0	3	0	0	0	1	0	10	0	5	0	1	1	11.5333	16.6333	57	0	1	3	1	1	1	1	80	1	2	3	0	3
192	0	0	10	1	2	3	0	18	1	10	1	20	1	30	1	0	0	92.3667	92.3667	57	0	1	3	1	1	1	1	90	1	2	0	0	2
193	0	0	6	1	3	10	1	0	0	8	0	10	0	5	0	0	0	56.1333	56.1333	58	0	1	2	0	0	1	1	5	0	1	0	0	1
194	0	0	15	1	3	60	1	3	1	18	1	50	1	10	1	0	0	90.6	90.6	58	0	1	2	0	1	1	1	55	1	1	0	0	1
195	0	0	1	0	0	3	0	0	0	1	0	0	0	0	0	0	0	55.2	55.2	58	0	1	3	1	1	1	1	60	1	1	0	0	1
196	0	0	8	1	3	25	1	3	1	10	1	18	0	3	0	0	0	59.6667	59.6667	58	0	1	3	1	1	1	1	70	1	2	1	0	2
197	0	0	55	1	2	5	0	4	1	4	0	4	0	5	0	0	0	70.1	70.1	58	0	1	3	1	1	1	1	70	1	2	0	0	2
198	0	0	0	0	0	0	0	0	0	20	1	25	1	30	1	0	0	93.5333	93.5333	58	0	1	3	1	0	0	0	70	1	1	0	0	1
199	0	0	30	1	3	12	1	0	0	10	1	30	1	1	0	0	0	60.4333	60.4333	58	0	1	3	1	1	1	1	80	1	2	0	0	2
200	10	1	2	0	1	30	1	0	0	16	1	33	1	5	0	0	0	60.5333	60.5333	59	0	1	3	1	0	0	0	15	1	2	1	0	2
201	0	0	0	0	0	1	0	0	0	0	0	1	0	0	0	0	0	78.1333	78.1333	59	0	1	2	0	1	1	1	30	1	1	0	0	1
202	0	0	1	0	0	3	0	0	0	4	0	4	0	0	0	0	0	89.5	89.5	59	0	1	2	0	1	1	1	40	1	4	3	0	3
203	0	0	1	0	1	40	1	5	1	20	1	35	1	5	0	0	0	66.4667	66.4667	59	0	1	3	1	0	1	1	10	0	1	0	0	1
204	0	0	13	1	3	65	1	10	1	10	1	35	1	10	1	0	0	70.1333	70.1333	59	0	1	3	1	1	1	1	40	1	1	0	0	1
205	0	0	15	1	3	65	1	18	1	25	1	60	1	30	1	0	0	59.6333	59.6333	59	0	1	2	0	0	1	1	40	1	2	1	0	2
206	0	0	1	0	1	12	1	5	1	4	0	8	0	5	0	0	0	89.7	89.7	59	0	1	3	1	1	1	1	50	1	1	0	0	1
207	0	0	45	1	3	12	1	1	1	3	0	10	0	3	0	1	0	13.2333	61.9333	59	0	1	3	1	0	1	1	60	1	2	0	0	2
208	0	0	20	1	3	10	1	1	1	13	1	20	1	3	0	0	0	59.9	59.9	59	0	1	3	1	1	1	1	60	1	2	0	0	2
209	0	0	1	0	0	0	0	0	0	1	0	1	0	1	0	0	0	60.9	60.9	59	0	1	2	0	1	1	1	80	1	2	0	0	2
210	15	1	30	1	3	55	1	1	1	50	1	75	1	10	1	1	0	13.8	87.9333	60	0	1	2	0	0	1	1	25	1	2	0	0	2
211	8	1	1	0	1	12	1	0	0	50	1	50	1	2	0	1	1	13.6333	21.8	60	0	1	3	1	1	1	1	40	1	3	3	0	3
212	0	0	60	1	3	50	1	10	1	20	1	30	1	10	1	0	0	81.1	81.1	60	0	1	3	1	1	1	1	40	1	1	0	0	1
213	0	0	1	0	1	20	1	0	0	20	1	50	1	10	1	0	0	88.4	88.4	60	0	1	2	0	0	0	0	60	1	2	3	0	3
214	0	0	25	1	2	5	0	5	1	4	0	5	0	1	0	0	0	60.4333	60.4333	60	0	1	3	1	0	1	1	70	1	1	0	0	1
215	0	0	5	1	3	12	1	5	1	4	0	15	0	5	0	0	0	87.0333	87.0333	60	0	1	2	0	1	1	1	80	1	2	0	0	2
216	70	1	15	1	3	10	1	10	1	10	1	30	1	5	0	0	0	55.2667	55.2667	61	0	1	3	1	0	1	1	30	1	2	0	0	2
217	0	0	1	0	1	10	1	5	1	16	1	21	1	2	0	0	0	62.1667	62.1667	61	0	1	2	0	0	1	1	40	1	2	0	0	2
218	0	0	1	0	0	8	0	0	0	1	0	1	0	1	0	1	1	24.4667	35.6333	61	0	1	3	1	1	1	1	50	1	1	0	0	1
219	0	0	13	1	3	20	1	8	1	18	1	40	1	5	0	1	0	6.7	54.3667	61	0	1	3	1	1	1	1	50	1	3	1	0	3
220	1	1	1	0	0	2	0	0	0	20	1	30	1	10	1	0	0	91.9	91.9	62	0	1	3	1	1	1	1	30	1	2	0	0	2
221	1	1	2	0	1	50	1	2	1	25	1	45	1	5	0	0	0	83.0333	83.0333	62	0	1	2	0	0	0	0	60	1	2	2	0	3
222	0	0	30	1	2	5	0	0	0	2	0	1	0	5	0	1	0	24.5333	82.8333	62	0	1	3	1	1	1	1	80	1	1	0	0	1
223	3	1	60	1	3	45	1	10	1	20	1	30	1	30	1	0	0	82.5	82.5	62	0	1	3	1	1	1	1	80	1	2	0	0	2
224	0	0	1	0	0	8	0	5	1	30	1	40	1	30	1	0	0	93.5667	93.5667	62	0	1	3	1	1	1	1	85	1	2	1	0	2
225	0	0	0	0	0	1	0	0	0	1	0	1	0	0	0	0	0	84.8333	84.8333	63	0	1	2	0	0	0	0	10	0	1	2	0	3
226	0	0	5	1	2	0	0	0	0	1	0	1	0	0	0	0	0	75.1667	75.1667	63	0	1	2	0	0	1	1	40	1	1	0	0	1
227	0	0	0	0	1	20	1	35	1	10	1	25	1	20	1	0	0	86.5333	86.5333	63	0	1	3	1	0	1	1	50	1	1	2	0	3
228	0	0	1	0	0	1	0	0	0	11	1	35	1	10	1	1	1	17.6667	30.8667	63	0	1	3	1	0	0	0	70	1	2	1	0	2
229	0	0	0	0	1	12	1	1	1	7	0	7	0	1	0	1	1	28.0667	57.5333	64	0	1	3	1	0	0	0	40	1	1	1	0	2
230	0	0	30	1	3	15	1	17	1	15	1	15	0	15	1	0	0	72.5667	72.5667	64	0	1	3	1	1	1	1	20	1	1	0	0	1
231	0	0	10	1	3	12	1	0	0	5	0	1	0	0	0	1	1	51.9	75.1667	64	0	1	2	0	0	1	1	25	1	2	1	0	2
232	0	0	30	1	3	70	1	20	1	30	1	30	1	10	1	0	0	37.3333	76.9333	64	0	1	2	0	1	1	1	30	1	1	0	0	1
233	0	0	10	1	3	70	1	8	1	8	0	25	1	20	1	1	0	74.9333	88.1	64	0	1	2	0	1	1	1	40	1	2	0	0	2
234	0	0	35	1	3	16	1	0	0	11	1	21	1	5	0	0	0	74.1667	74.1667	64	0	1	3	1	1	1	1	85	1	2	0	0	2
235	0	0	5	1	3	10	1	10	1	15	1	23	1	30	1	0	0	84.7	84.7	65	0	1	3	1	0	0	0	30	1	1	0	0	1
236	50	1	1	0	0	3	0	0	0	11	1	31	1	2	0	0	0	93.7	93.7	66	0	1	2	0	1	1	1	5	0	2	2	0	3
237	90	1	25	1	3	20	1	5	1	7	0	10	0	10	1	0	0	60.9	60.9	66	0	1	2	0	0	0	0	15	1	2	1	0	2
238	0	0	1	0	0	0	0	0	0	10	1	10	0	5	0	0	0	94.8333	94.8333	67	0	1	3	1	0	0	0	5	0	1	1	0	2
239	1	1	1	0	0	5	0	10	1	45	1	75	1	10	1	1	1	36.7333	44.8	67	0	1	3	1	1	1	1	15	1	1	0	0	1
240	90	1	4	0	1	20	1	0	0	10	1	45	1	5	0	1	1	4.46667	22.6	67	0	1	3	1	1	1	1	10	0	3	0	0	2
241	0	0	8	1	3	30	1	5	1	15	1	25	1	0	0	0	0	80.8667	80.8667	67	0	1	3	1	1	1	1	40	1	1	1	0	2
242	0	0	25	1	2	8	0	3	1	2	0	5	0	0	0	0	0	83.7667	83.7667	67	0	1	3	1	0	1	1	50	1	2	0	0	2
243	0	0	5	1	3	20	1	15	1	8	0	8	0	5	0	0	0	74.5333	74.5333	67	0	1	2	0	0	1	1	60	1	2	0	0	2
244	0	0	0	0	1	20	1	2	1	13	1	30	1	30	1	0	0	87.9	87.9	67	0	1	3	1	1	1	1	90	1	1	1	0	2
245	0	0	1	0	1	33	1	0	0	25	1	45	1	5	0	0	0	59.1667	59.1667	68	0	1	3	1	1	1	1	35	1	2	0	0	2
246	0	0	0	0	0	1	0	0	0	0	0	1	0	0	0	0	0	86.8	86.8	68	0	1	3	1	1	1	1	60	1	1	3	0	3
247	75	1	3	0	1	20	1	5	1	20	1	40	1	20	1	0	0	74.4333	74.4333	70	0	1	2	0	1	1	1	60	1	2	0	0	2
248	50	1	0	0	0	5	0	0	0	3	0	4	0	1	0	1	1	16.7667	19.1667	70	0	1	2	0	0	0	0	80	1	2	3	0	3
249	0	0	25	1	3	35	1	0	0	15	1	35	1	5	0	1	1	39.3333	39.3333	71	0	1	3	1	1	1	1	35	1	2	1	0	2
250	15	1	2	0	0	1	0	5	1	5	0	5	0	10	1	0	0	92.1	92.1	72	0	1	3	1	0	1	1	60	1	1	0	0	1
251	0	0	9	1	3	20	1	0	0	4	0	8	0	5	0	0	0	85.6	85.6	74	0	1	3	1	0	1	1	50	1	1	0	0	1
252	0	0	75	1	3	50	1	6	1	15	1	40	1	30	1	1	1	36.1667	38.1667	74	0	1	3	1	1	1	1	80	1	2	3	0	3
253	0	0	33	1	3	20	1	1	1	10	1	13	0	8	1	0	0	57.9	57.9	75	0	1	3	1	1	1	1	40	1	2	0	0	2
254	70	1	1	0	0	1	0	0	0	8	0	30	1	5	0	1	1	52.8	52.8	79	0	1	2	0	1	1	1	20	1	1	1	0	2
